# Supplementary material for: Clinical Correlates of Incidental Probable Benign Pulmonary Nodules with Diameters Less than 8 mm in a Healthy Korean Cohort: A Retrospective Study
Source: MDPI journal article supplement (doi:10.3390/jcm12237501), 2023-12-04
Supplement: s1 [file s1]

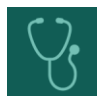**Table S1.** Participants' sociodemographics and comorbidities in subgroups with single or multiple nodules (N=355).

| Variables                           | Single nodule<br>(n = 171) | Multiple nodules<br>(n =184) | p-value |
|-------------------------------------|----------------------------|------------------------------|---------|
| Sex, n (%)                          |                            |                              |         |
| Male                                | 113 (66.1)                 | 143 (77.7)                   | 0.015   |
| Female                              | 58 (33.9)                  | 41 (22.3)                    |         |
| Age (years), mean (SD)              | 52.6 (6.4)                 | 53.4 (6.4)                   | 0.248   |
| Weight (kg), mean (SD)              | 68.2 (12.3)                | 70.9 (11.3)                  | 0.034   |
| Height (cm), mean (SD)              | 167.8 (8.3)                | 169.7 (7.6)                  | 0.024   |
| WC (cm), mean (SD)                  | 85.5 (8.7)                 | 87.2 (8.3)                   | 0.059   |
| BMI (kg/m <sup>2</sup> ), mean (SD) | 24.1 (3.1)                 | 24.5 (2.7)                   | 0.181   |
| Smoking, n (%)                      |                            |                              | 0.058   |
| Never                               | 72 (42.1)                  | 57 (31.0)                    | 0.319   |
| Former                              | 52 (30.4)                  | 75 (40.8)                    |         |
| Current                             | 47 (27.5)                  | 52 (28.3)                    |         |
| Drinking frequency, n (%)           |                            |                              |         |
| None                                | 33 (19.3)                  | 21 (11.4)                    |         |
| ≤1/month                            | 25 (14.6)                  | 27 (14.7)                    | 0.336   |
| 2–4/month                           | 48 (28.1)                  | 62 (33.7)                    |         |
| 2–3/week                            | 47 (27.5)                  | 52 (28.3)                    |         |
| ≥4/week                             | 18 (10.5)                  | 22 (12.0)                    |         |
| Family history of cancer, n (%)     | 74 (43.3)                  | 89 (48.4)                    | 0.336   |
| Taking any medicines, n (%)         | 82 (48.0)                  | 98 (53.3)                    | 0.318   |
| Comorbidities, n (%)                |                            |                              |         |
| History of any cancer               | 8 (4.7)                    | 8 (4.3)                      | 0.881   |
| Hypothyroidism                      | 4 (2.3)                    | 4 (2.2)                      | 1.000   |
| DM                                  | 12 (7.0)                   | 13 (7.1)                     | 0.986   |
| Dyslipidaemia                       | 33 (19.3)                  | 35 (19.0)                    | 0.947   |
| Hypertension                        | 42 (24.6)                  | 51 (27.7)                    | 0.499   |
| CAD                                 | 18 (10.5)                  | 22 (12.0)                    | 0.670   |

Abbreviations: BMI, body mass index; CAD, coronary artery disease; DM, diabetes mellitus; SD, standard deviation; WC, waist circumference.

**Table S2.** Participants' laboratory test results and imaging findings by subgroups with single or multiple nodules (N=355).

| Variables                            | Single nodule<br>(n = 171) | Multiple nodules<br>(n = 184) | p-value |
|--------------------------------------|----------------------------|-------------------------------|---------|
| Glucose (mg/dL), mean (SD)           | 99.5 (16.4)                | 98.4 (17.2)                   | 0.548   |
| Creatinine (mg/dL), mean (SD)        | 0.85 (0.17)                | 0.88 (0.14)                   | 0.072   |
| BUN (mg/dL), mean (SD)               | 12.9 (3.0)                 | 13.9 (3.6)                    | 0.0050  |
| AST (IU/L), mean (SD)                | 26.4 (10.4)                | 27.3 (11.5)                   | 0.442   |
| ALT (IU/L), mean (SD)                | 26.7 (17.5)                | 27.7 (16.0)                   | 0.551   |
| Total cholesterol (mg/dL), mean (SD) | 186.6 (37.8)               | 187.8 (36.4)                  | 0.754   |
| Triglyceride, mean (SD)              | 115.8 (62.6)               | 126.2 (80.5)                  | 0.173   |
| HDL cholesterol (mg/dL), mean (SD)   | 56.1 (15.7)                | 53.1 (14.5)                   | 0.065   |
| LDL cholesterol (mg/dL), mean (SD)   | 123.1 (35.3)               | 125.4 (33.1)                  | 0.534   |
| Haemoglobin (g/dL), mean (SD)        | 14.6 (1.6)                 | 14.9 (1.4)                    | 0.043   |
| HbA1C (%), mean (SD)                 | 5.62 (0.50)                | 5.64 (0.54)                   | 0.746   |
| TSH (μU/mL), mean (SD)               | 2.42 (1.37)                | 2.42 (1.56)                   | 1.000   |
| Free T4 (ng/dL), mean (SD)           | 1.40 (0.16)                | 1.44 (0.16)                   | 0.031   |
| <i>H. pylori</i> IgG Ab, n (%)       |                            |                               | 0.022   |
| Negative                             | 89 (52.0)                  | 89 (48.4)                     |         |
| Equivocal                            | 20 (11.7)                  | 9 (4.9)                       |         |

|                             |             |            |       |
|-----------------------------|-------------|------------|-------|
| Positive                    | 62 (36.3)   | 86 (46.7)  |       |
| Thyroid ultrasound, n (%)   | 74 (54.0)   | 96 (61.9)  | 0.171 |
| Abdomen ultrasound, n (%)   | 127 (74.3)  | 127 (69.0) | 0.274 |
| EGD, n (%)                  | 40 (24.5)   | 40 (23.3)  | 0.783 |
| Colonoscopy, n (%)          | 83 (59.3)   | 93 (60.8)  | 0.794 |
| FVC % predicted, mean (SD)  | 90.4 (9.2)  | 91.6 (9.7) | 0.229 |
| FEV1 % predicted, mean (SD) | 90.8 (10.0) | 91.0 (9.9) | 0.905 |

Abbreviations: ALT, alanine aminotransferase; AST, aspartate aminotransferase; BUN, blood urea nitrogen; EGD, esophagogastroduodenoscopy; FEV1, the first second of forced expiration; FVC, forced vital capacity; HDL, high-density lipoprotein; HbA1C, glycated haemoglobin; H. pylori IgG, Helicobacter pylori immunoglobulin G; LDL, low-density lipoprotein; T4, thyroxine; TSH, thyroid-stimulating hormone; SD, standard deviation.

**Table S3.** Results of logistic regression of risk factors for multiple (single vs. multiple) lung nodules (N=355).

| Variables                                | Univariate logistic regression |         | Multivariate logistic regression |              |
|------------------------------------------|--------------------------------|---------|----------------------------------|--------------|
|                                          | OR (95% CI)                    | p-value | aOR (95% CI)                     | p-value      |
| Female, sex                              | 0.56 (0.35–0.89)               | 0.015   |                                  |              |
| Age (per 10-year increase)               | 1.21 (0.87–1.69)               | 0.248   | 0.96 (0.31–3.01)                 | 0.944        |
| Weight (per 10-kg increase)              | 1.21 (1.01–1.45)               | 0.035   |                                  |              |
| Height (per 10-cm increase)              | 1.36 (1.04–1.77)               | 0.025   | 1.02 (0.75–1.39)                 | 0.883        |
| WC (per 10-cm increase)                  | 1.27 (0.99–1.63)               | 0.060   | 1.01 (0.60–1.69)                 | 0.974        |
| BMI                                      | 1.05 (0.98–1.13)               | 0.179   |                                  |              |
| Smoking                                  |                                |         |                                  |              |
| Never                                    | REF                            |         | REF                              |              |
| Former                                   | 1.82 (1.11–2.99)               | 0.018   | 1.38 (0.63–3.01)                 | 0.416        |
| Current                                  | 1.40 (0.83–2.36)               | 0.212   | 1.15 (0.52–2.55)                 | 0.731        |
| Drinking frequency                       |                                |         |                                  |              |
| None                                     | REF                            |         | REF                              |              |
| ≤1/month                                 | 1.70 (0.78–3.67)               | 0.179   | 1.79 (0.79–4.03)                 | 0.161        |
| 2–4/month                                | 2.03 (1.04–3.94)               | 0.037   | 1.75 (0.81–3.75)                 | 0.152        |
| 2–3/week                                 | 1.74 (0.89–3.41)               | 0.108   | 1.37 (0.60–3.10)                 | 0.451        |
| ≥4/week                                  | 1.92 (0.84–4.40)               | 0.123   | 1.51 (0.57–4.00)                 | 0.402        |
| Family history of cancer                 | 1.23 (0.81–1.87)               | 0.336   |                                  |              |
| Comorbidities                            |                                |         |                                  |              |
| History of any cancer                    | 0.93 (0.34–2.52)               | 0.881   |                                  |              |
| Any medication                           | 1.24 (0.82–1.88)               | 0.318   |                                  |              |
| Hypothyroidism                           | 0.93 (0.23–3.77)               | 0.917   |                                  |              |
| DM                                       | 1.01 (0.45–2.27)               | 0.986   |                                  |              |
| Dyslipidaemia                            | 0.98 (0.58–1.67)               | 0.948   |                                  |              |
| Hypertension                             | 1.18 (0.73–1.89)               | 0.499   |                                  |              |
| CAD                                      | 1.15 (0.60–2.23)               | 0.671   |                                  |              |
| Glucose (per 10-unit increase)           | 0.96 (0.85–1.09)               | 0.548   |                                  |              |
| Creatinine                               | 3.47 (0.90–13.39)              | 0.071   | 0.57 (0.08–4.09)                 | 0.572        |
| BUN                                      | 1.09 (1.03–1.17)               | 0.006   | <b>1.09 (1.02–1.17)</b>          | <b>0.016</b> |
| AST                                      | 1.01 (0.99–1.03)               | 0.442   |                                  |              |
| ALT                                      | 1.00 (0.99–1.02)               | 0.550   |                                  |              |
| Total cholesterol (per 10-unit increase) | 1.01 (0.95–1.07)               | 0.753   |                                  |              |
| Triglyceride (per 10-unit increase)      | 1.02 (0.99–1.05)               | 0.181   |                                  |              |
| HDL cholesterol                          | 0.99 (0.97–1.00)               | 0.064   | 0.99 (0.98–1.01)                 | 0.507        |
| LDL cholesterol (per 10-unit increase)   | 1.02 (0.96–1.08)               | 0.533   |                                  |              |
| Haemoglobin                              | 1.16 (1.00–1.34)               | 0.044   | 1.08 (0.87–1.34)                 | 0.486        |
| HbA1C                                    | 1.07 (0.71–1.60)               | 0.746   |                                  |              |

|                                    |                   |       |                   |       |  |
|------------------------------------|-------------------|-------|-------------------|-------|--|
| <i>H. pylori</i> IgG Ab            |                   |       |                   |       |  |
| Negative                           | REF               |       | REF               |       |  |
| Equivocal                          | 0.45 (0.19–1.04)  | 0.063 | 0.44 (0.18–1.04)  | 0.062 |  |
| Positive                           | 1.39 (0.89–2.15)  | 0.144 | 1.44 (0.91–2.29)  | 0.119 |  |
| TSH                                | 1.00 (0.87–1.15)  | 1.000 |                   |       |  |
| Free T4                            | 4.28 (1.13–16.20) | 0.032 | 3.78 (0.92–15.52) | 0.065 |  |
| Thyroid ultrasound                 | 1.39 (0.87–2.21)  | 0.171 |                   |       |  |
| Abdomen ultrasound                 | 0.77 (0.49–1.23)  | 0.274 |                   |       |  |
| Esophagogastroduodenoscopy         | 0.93 (0.56–1.54)  | 0.783 |                   |       |  |
| Colonoscopy                        | 1.06 (0.67–1.70)  | 0.794 |                   |       |  |
| FVC % PRED (per 1% PRED increase)  | 1.01 (0.99–1.04)  | 0.228 |                   |       |  |
| FEV1 % PRED (per 1% PRED increase) | 1.00 (0.98–1.02)  | 0.905 |                   |       |  |

Abbreviations: ALT, alanine aminotransferase; aOR, adjusted odds ratio; AST, aspartate aminotransferase; BMI, body mass index; BUN, blood urea nitrogen; CAD, coronary artery disease; DM, diabetes; FEV1, the first second of forced expiration; FVC, forced vital capacity; HDL, high-density lipoprotein; HbA1C, glycated haemoglobin; *H. pylori* IgG, *Helicobacter pylori* immunoglobulin G; LDL, low-density lipoprotein; PRED, predicted; REF, reference; T4, thyroxine; TSH, thyroid-stimulating hormone.

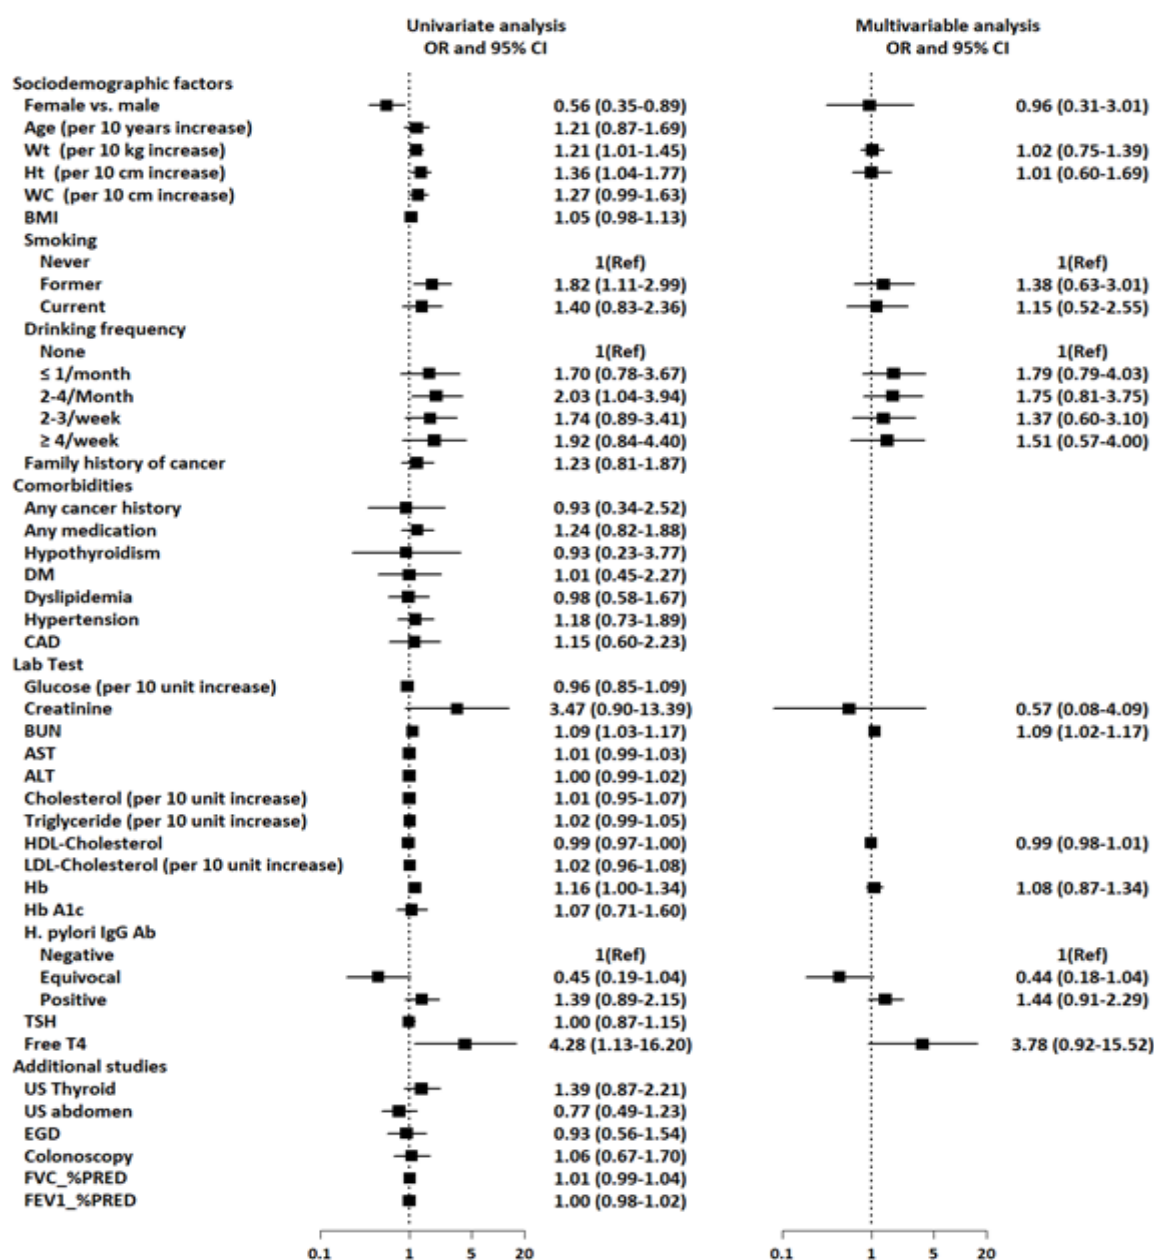

**Figure S1.** Forest plots showing the factors associated with multiple lung nodules. Abbreviations: ALT, alanine aminotransferase; AST, aspartate aminotransferase; BMI, body mass index; BUN, blood urea nitrogen; CAD, coronary artery disease; CI, confidence interval; DM, diabetes mellitus; EGD, esophagogastroduodenoscopy; FEV1, the first second of forced expiration; FVC, forced vital capacity; HDL, high-density lipoprotein; HbA1C, glycated haemoglobin; *H. pylori* IgG, *Helicobacter pylori* immunoglobulin G; LDL, low-density lipoprotein; PRED, predicted; REF, reference; T4, thyroxine; TSH, thyroid-stimulating hormone.
